# Supplementary material
Source: ML conference proceedings conference paper supplement (https://proceedings.mlr.press/v139/zhang21j.html)
Supplement: Supplementary file 2 [file zhang21j-supp.zip]

Archive with 6 entries (5 files):
- supplementary/
- __MACOSX/._supplementary
- supplementary/FDR-11-23.pdf
- __MACOSX/supplementary/._FDR-11-23.pdf
- supplementary/code.zip
- __MACOSX/supplementary/._code.zip
